# Supplementary material for: Cardiovascular and Mortality Outcomes in the Elderly With Impaired Cardiac and Pulmonary Function: The Cardiovascular Health Study (CHS)
Source: PubMed Central journal article supplement — J Am Heart Assoc. 2015 Dec 8;4(12):e002308. doi: 10.1161/JAHA.115.002308 (PMC4845280; doi:10.1161/jaha.115.002308), 2015-12-08
Supplement: JAH3-4-e002308-s001.pdf [file JAH3-4-e002308-s001.pdf]

SUPPLEMENTAL MATERIAL

Table S1

|                             | LVSD<br>(Yes vs. No) | IPF<br>(Yes vs. No) | LVSD<br>(Yes vs. No)* | IPF<br>(Yes vs. No)** | Both LVSD<br>and IPF |
|-----------------------------|----------------------|---------------------|-----------------------|-----------------------|----------------------|
| Heart Failure               | 2.2 (1.6, 2.9)       | 1.7 (1.4, 2.1)      | 2 (1.5, 2.7)          | 1.7 (1.4, 2)          | 3.2 (2.0, 5.1)       |
| Cardiovascular<br>mortality | 1.9 (1.4, 2.7)       | 1.5 (1.2, 1.9)      | 1.8 (1.3, 2.5)        | 1.5 (1.2, 381)        | 2.8 (1.7, 4.7)       |
| All cause mortality         | 1.4 (1.1, 1.7)       | 1.7 (1.5, 1.9)      | 1.3 (1.1, 1.6)        | 1.6 (1.4, 1.9)        | 2.1 (1.5, 3.0)       |
| Composite                   | 1.6 (1.3, 2)         | 1.7 (1.5, 1.9)      | 1.5 (1.3, 1.9)        | 1.6 (1.5, 1.9)        | 2.3 (1.7, 3.3)       |

Abbreviations: LVSD= Left ventricular systolic dysfunction, IPF=Impaired pulmonary function.

All hazard ratios adjusted for age, race, gender, total cholesterol, history of diabetes, hypertension, smoking, and body mass index, time difference between the two exposure measurements

\*Further adjusted for IPF

\*\*Further adjusted for LVSD
